1 Title: Primary health facility readiness to care for infants under six  
2 months at risk of poor growth and development: A HHFA-based survey

3 Short Title:

4 Primary health facility readiness and nutrition in infants under six months

5 Authors:

6 Tabitha D. van Immerzeel<sup>1,2</sup>, Abou Ba<sup>1,3</sup>, Maty Diagne<sup>1</sup>, Indou Deme-Ly<sup>1,4</sup>, Amanda E. Murungi<sup>5</sup>,

7 Rebecca Penzias<sup>2</sup>, Daouda Seck<sup>1</sup>, Abdallah Diallo<sup>3</sup>, Carlos S. Grijalva-Eternod<sup>6</sup>, Marko Kerac<sup>6</sup>, Louise T.

8 Day<sup>2</sup>

9

10 1. Cheikh Anta Diop University, Dakar, Senegal

11 2. Department of Infectious Disease Epidemiology and International Health, London School of Hygiene  
12 & Tropical Medicine, London, UK

13 3. Social Paediatric Institute, Dakar, Senegal

14 4. National Paediatric Hospital Albert Royer, Dakar, Senegal

15 5. Mulago National Referral Hospital, Kampala, Uganda

16 6. Department of Population Health, London School of Hygiene & Tropical Medicine, London, UK

17

18 Correspondance: [Tabitha.van-Immerzeel@lshtm.ac.uk](mailto:Tabitha.van-Immerzeel@lshtm.ac.uk)

19

**NOTE: This preprint reports new research that has not been certified by peer review and should not be used to guide clinical practice.**

## 20 Abstract

21 Malnutrition in infants under six months of age (u6m) is poorly identified and managed in many  
22 countries, increasing these children's risk of poor growth and development and preventable mortality  
23 and morbidity. New 2023 WHO malnutrition guidelines recommend assessment, classification and  
24 treatment at primary health care level. This study aimed to assess primary health facility availability  
25 and readiness for WHO-recommended nutritional care in infants u6m.

26 We adapted the WHO Harmonized Health Facility Assessment (HHFA) with additional items for  
27 Management of small and nutritionally At-risk Infants u6m and their Mothers (MAMI): the HHFA-  
28 MAMI tool. Methods included survey of health care providers, direct observation and data extraction  
29 from routine registers to calculate mean percentages of a set of items for different readiness areas.  
30 We assessed 15 primary health facilities in Senegal, focusing on the five contact points for infants u6m:  
31 delivery and postnatal care, immunization programmes, sick child clinics and community health care.  
32 The HHFA-MAMI scores with interquartile range (n=15) were: general service availability 51% (35-63),  
33 general service readiness 69% (64-76), management & finance 50% (44-59), clinical quality of care  
34 48%. MAMI availability scored 50% and readiness 36%, MAMI infrastructure scored 72%, health  
35 workforce 61%, assess MAMI 53%, classify MAMI 17% and treat MAMI 38%, equipment 32% and  
36 guidelines & training 23%. Service utilization was highest in postnatal care and immunization contact  
37 points, MAMI availability & readiness was highest in delivery and postnatal care.

38 We conclude that primary health facilities in Senegal have potential to care for infants u6m at risk of  
39 poor growth and development with high general PHC readiness and frequent use of care contact  
40 points for infants u6m. MAMI availability and readiness require improvements to provide WHO-  
41 recommended care.

42

## 43 Introduction

44 Infants under six months of age (u6m) are often left behind in global efforts to reduce child  
45 malnutrition [1, 2]. Nutritional risk begins in utero, and continues during the neonatal period and  
46 thereafter [3]. More than a quarter of babies worldwide are born low birth weight (LBW) either as a  
47 result of being preterm, growth-restricted or both [4]. In a review of 54 low and middle-income  
48 countries, between birth and six months of age, an estimated 20.1% classified as underweight, 21.3%  
49 wasted and 17.6% stunted [5]. When at risk at u6m, these infants will continue to be at risk of both  
50 wasting and stunting later in life [6] and have a higher risk of mortality [7]. Longer-term consequences  
51 include impaired development [8],[9] and increased risk of developing cardiometabolic non-  
52 communicable diseases in adult life [10].

53 In 2023, the World Health Organization (WHO) published *Guidelines on the prevention and*  
54 *management of wasting and nutritional oedema (acute malnutrition) in infants and children under 5*  
55 *years*, which propose a transformative shift in approach for infants u6m, from predominantly hospital-  
56 based care to outpatient, primary health care (PHC) [11]. The rationale is that improved PHC will reach  
57 more infants u6m and prevent adverse outcomes [12]. Defined by WHO as “infants less than six  
58 months of age at risk of poor growth and development”, the emphasis of the guidelines is on early  
59 detection and timely support for the infant and mother dyad. The case definition for programme  
60 enrolment includes infants born small or preterm as well as infants u6m with poor anthropometry as a  
61 single or sequential measure (Textbox 1). Treatment, individually tailored for the dyad, includes  
62 intensive feeding support (breastfeeding or/and supplementary feeding for lactational failure) and  
63 detection and management of physical and mental health conditions for the mother and infant.

64

65 *Textbox 1. Summary of WHO 2023 guidelines for infants under six months at risk of poor growth and*  
66 *development*

**Summary WHO 2023 guidelines for infants under six months at risk of poor growth and development**

*Assess*

- Screening at care contact points (e.g. delivery care, postnatal care, immunization programs, sick child clinics, community health care);
- Assessment of anthropometry, feeding, infant clinical and maternal nutrition and mental health;
- Mothers and infants are considered an interdependent dyad.

*Classify*

- Infants u6m with poor anthropometry (weight for length z-score <-2SD/ weight for age z-score) <-2SD/ mid upper arm circumference < 110 from 6 weeks) based on a single measure;
- Infants u6m with poor growth based on sequential measures;
- Infants born preterm/ low birth weight/ small for gestational age;
- Infants with known risk factors for poor growth and development (e.g. feeding problems, congenital issues).

*Treat*

- Referral to inpatient care for any 'danger signs' (as per IMCI e.g. fast breathing, lethargic, convulsions, refuses to drink);
- Outpatient treatment focused support for any underlying problem e.g. clinical treatment;
- Breastfeeding support, supplementary feeding (after comprehensive assessment), maternal mental health support;
- Follow-up until six months of age.

67

68 A care package consistent with the new WHO guidelines [13] had been previously developed by the  
69 MAMI (Management of small and nutritionally At-risk Infants u6m and their Mothers) Global Network  
70 of researchers, programmers and policy makers [14]. This MAMI Care Pathway uses similar case  
71 definitions and care principles as the WHO guidelines, and has been used to frame and inform our  
72 study [15].

73 Now that countries are starting to implement the new WHO guidelines, health facility assessment is an  
74 important first step in adapting to local contexts. WHO recently launched the Harmonized Health  
75 Facility Assessment (HHFA) [16], a novel comprehensive tool advancing previous tools. The HHFA data  
76 collection uses mixed methods: health worker surveys, direct observations and data extraction from  
77 routine registers, using closed questions and checklists. Items of service readiness are measured across  
78 the following dimensions and areas:

- 79 1. General service availability (areas: health infrastructure, health workforce and services  
80 available),
- 81 2. General service readiness (areas: amenities, basic equipment, infection prevention, diagnostic  
82 capacity, essential medicines and commodities),
- 83 3. An optional dimension of Service-specific availability & readiness
- 84 4. Management & finance (areas: facility governance, finances and accounting, staff support  
85 systems, quality and safety systems, information systems), and
- 86 5. Clinical quality of care (areas: record review for specific services).

87 The concept of service readiness assessment has been used to evaluate various programmes, such as  
88 emergency obstetric care [17], non-communicable diseases [18] and elderly care [19]. In the HHFA, a  
89 few nutrition related items are captured such as infant scales under equipment and service -specific  
90 items for small and sick newborns. However, nutritional care for infants u6m at PHC is currently not  
91 captured by the HHFA.

92 In Senegal, as in many countries, PHC for infants u6m is provided at five contact points along the  
93 continuum of care: delivery care, postnatal care, immunization programmes, sick child clinics and  
94 community health care [20]. Most (82%) births take place in a health facility [21], providing essential  
95 newborn care. Most (80%) mothers attend at least one postnatal visit [21]. Full vaccination coverage at  
96 23 months is currently 77% [21]. Integrated Management of Childhood Illnesses (IMCI) is offered at  
97 many primary health facilities [22], but healthcare-seeking behaviour remains low at 50% for fever or  
98 diarrhoea [21]. Community preventative services, including growth monitoring activities, are offered  
99 for children from birth to 59 months [23]. Currently, infants with low birth weight (estimated  
100 prevalence 11%) or malnutrition u6m (estimated prevalence 8%) [24], are managed as inpatients at  
101 secondary (health centres) or tertiary level (hospital) according to national guidelines [25]. However,  
102 qualitative research revealed mothers' and health providers' preference for outpatient care for  
103 uncomplicated cases, to make care more accessible and closer to the community [26].

104 This study aimed to assess primary health facility availability and readiness for WHO-recommended  
105 nutritional detection and care in infants under six months. The objectives were:

- 106 1. To measure general service readiness in primary health facilities in Senegal
- 107 2. To measure service-specific MAMI availability and readiness in primary health facilities in  
108 Senegal
- 109 3. To assess opportunities to implement WHO-recommended nutritional care for infants u6m at  
110 five primary health care contact points.

111

## 112 [Methods](#)

113 We conducted a descriptive, cross-sectional survey in 15 PHC facilities in three districts in Senegal,  
114 from 9 June to 17 September 2023, reported in alignment with the STROBE guidelines [27].

### 115 [Setting and sites](#)

116 In Senegal, primary health facilities are staffed by a team of at least one certified state nurse, one  
117 midwife and a few nurse assistants. Each health facility is assigned a catchment area target population  
118 and provides all basic primary care for this population, including infants u6m at five contact points:  
119 delivery with essential newborn care, postnatal care, immunization programme and sick child clinic  
120 (IMCI). Community health care is coordinated by these facilities, each for its catchment areas. The  
121 health district provides administrative and financial management and supervision of the primary  
122 health facilities but development partners coordinate and finance the community health care. The  
123 country of Senegal has 77 health districts and 809 primary health facilities, each covering on average  
124 11,500 inhabitants [28].

### 125 [Survey tool development](#)

126 We adapted the original HHFA [16] (Version 2) for PHC level in Senegal using the national health care  
127 policy plan [28], expert review including co-authors who practice clinically in Senegal (TvI, AB and DS),

128 and feedback from pilot testing. Adaptation kept fidelity to the dimensions (general service availability,  
129 general service readiness, management & finance, and clinical quality of care) as well as their areas  
130 (Figure 1). Sub-areas and items under the sub-areas were selected and adapted applying several  
131 iterative steps:

- 132 - Selecting sub-areas relevant for PHC level (e.g. sub-area “beds” and “oxygen services” were  
133 not selected)
- 134 - Removing items that are not relevant for primary care in Senegal (e.g. “existence of a quality  
135 committee”, which is not implemented on this level).
- 136 - Reformulating certain items to be more appropriate to the local context (e.g. changing  
137 “governing board” to “health committee”)
- 138 - Reorganising the order of items for efficiency (e.g. all observations of the infrastructure/  
139 equipment at the end of the survey, all questions for the midwife grouped)
- 140 - Simplifying certain items, such as capturing equipment as present only when functional.
- 141 - For the record review sub-area, instead of the malaria and prenatal care record review that  
142 were available for the HHFA version 2, we selected immunization and IMCI, because of  
143 practicality.
- 144 - Adding one sub-area: to complete the clinical quality of care dimension, the sub-area “direct  
145 observations of care” was added. We used the observation checklist from SARA (Service  
146 Availability and Readiness Assessment)[29].

147 For the health facility density and nurse/ midwife density we used the WHO global standards [30].

148 *Figure 1. Flow diagram of HHFA-MAMI tool development and health facility survey sampling*

149 Following the format of the original HHFA, we collected three primary data :

- 150 - Health care provider survey closed questions, (yes/ no, or checklist), used for items concerning  
151 service delivery and organization of care.

- 152 - Direct observations, using a checklist for observed items (used for building, equipment,  
153 commodities and hygiene).
- 154 - Data from registers and reports, used for record review, number or patient visits and target  
155 population.

156 The final primary health facility assessment tool consisted of a selection of 137 of the 2571 original  
157 items across the four dimensions (S1 Appendix 1 for a full list of items).

158 We created a service-specific dimension “MAMI availability & readiness”, using similar areas as other  
159 service-specific dimensions that exist in the HHFA: health infrastructure, health workforce, service  
160 availability, equipment and guidelines & training. We (Tvl, AB and LD all clinicians and public health  
161 practitioners) mapped items from the evidence-based MAMI Care Pathway[14], developed in 2021  
162 which aligns with the 2023 WHO guidelines. The MAMI Care Pathway uses with the WHO IMCI  
163 structure of “assess, classify and treat”, which we adopted as sub-headings under MAMI availability.

164 The final “MAMI availability & readiness” dimension had 42 items, repeated for five care contact  
165 points, making 210 items in total (Figure 1, Annex 1).

166 The draft HHFA-MAMI tool was translated into French and pilot tested by Tvl and a research assistant  
167 in a non-participating health facility and further revised by an iterative process in two rounds.

## 168 Sampling

169 We used a multi-step sampling process (Figure 1). First, we purposively selected three districts among  
170 the 77 in Senegal- where collaborators had existing partnerships: two rural (Dahra, Kaffrine) and one  
171 urban (Pikine) district. The sample size was determined by resources available for the study, as has  
172 been described in earlier service readiness studies with sample sizes of between 12 and 30 health  
173 facilities [31],[32]. We selected fifteen PHC facilities, five from each district using random number  
174 allocation from the sample frame list from the chief medical officer (18 facilities in Dahra, 24 in  
175 Kaffrine and 12 in Pikine). This was a descriptive pilot study, not testing hypotheses, therefore we did  
176 not calculate formal a-priori sample size.



## 177 Data collection

178 Two researchers (Tvl - a Dutch medical doctor living and working in Senegal and a Senegalese state  
179 nurse) conducted the HHFA-MAMI survey over two days at each health facility. Participants were  
180 recruited from the selected facilities from 9 June to 17 September 2023. On the first day, a face-to-  
181 face general questionnaire was administered to the focal point of the facility– the head nurse, who  
182 chose the convenient time and place. The head nurse then provided access to reports and registers  
183 needed for data extraction, appointed staff members with whom to conduct the rest of the face-to-  
184 face survey and organised the observations. The following day was used for observations of building,  
185 equipment and consultations and the remaining survey questions. We recruited mother/ infant dyads  
186 for observing a consultation at convenience (all infants u6m consulted at any of the contact points  
187 during the second survey day). Register data were accessed during the same time period (from 9 June  
188 to 17 September 2023), record reviews were selected randomly (ten from each contact point, starting  
189 at a different month at each facility).

## 190 Data management and analysis

191 HHFA-MAMI data were collected using a password-protected tablet onto a customized digital ODK  
192 form [33]. The tablet synchronised with an encrypted central database, manually checked by the data  
193 collection team, exported [34] and saved on the LSHTM-secured cloud storage, on a password-  
194 protected device. We calculated the percentage and interquartile ranges of health facilities (n=15) that  
195 scored positively for each item (Figure 1), and the mean scores of a group of items (sub-area), with  
196 equal weighting. An area as well as dimension total mean score was calculated, again with equal  
197 weighting. These scores were used to compare between the five contact points.

## 198 Ethics

199 Ethical approval was obtained from the National Ethics Committee in Senegal (Ref: SEN 19/78) and  
200 LSHTM (Ref: 28311). Informed consent was obtained from all health providers with provision of an  
201 information sheet prior to conducting the surveys. Written informed consent with provision of an

202 information sheet, was obtained from the mothers, or a trusted witness (family member/ neighbour)  
203 at the mother's request, before observing a consultation with their infant. Although patient  
204 identifiable data were accessible to the researchers who extracted data, all register data were  
205 collected with no identifiers.

206

## 207 Results

208 The catchment area population for the included primary health facilities was (mean, interquartile  
209 range (IQR)) 19,067 (9079-26,089) people of which 663 (213- 415) infants u6m (Table 1).

210 *Table 1. Characteristics of the population being served and seeking care at the PHC contact points of*  
211 *the selected PHC facilities.*

| Population characteristics (2022) for selected primary health facilities (n=15) |                      |
|---------------------------------------------------------------------------------|----------------------|
|                                                                                 | (mean, IQR)          |
| Target whole population                                                         | 19,067 (9079-26,089) |
| Expected births                                                                 | 664 (373-963)        |
| Target population u6m                                                           | 338 (213-415)        |
| Service utilisation (number of visits in 2022)                                  |                      |
| Curative care visits all ages (n=15)                                            | 11,073 (2990-9190)   |
| Delivery care (n=15)                                                            | 302 (151-410)        |
| Postnatal care (n=15)                                                           | 785 (315-1319)       |
| Immunization program (n=15)                                                     | 1093 (389-1541)      |
| Sick child clinic (n=15)                                                        | 389 (133-419)        |
| Community Health (n=10)                                                         | 323 (102-482)        |

212

213 In each of the 15 primary health facilities, we conducted between one and four interviews (n=32), zero  
214 to five direct care observations (n=49) and 19-20 record reviews (n=288).

215

## 216 General service readiness in primary health facilities (objective 1)

217 The HHFA-MAMI general scores with interquartile range (n=15) were: general service availability 51%  
218 (35-63), general service readiness 69% (64-76), management & finance 50% (44-59) and clinical quality  
219 of care 48%.

220 Within general service availability, infrastructure (50%, 41-53) and health workforce (21%, 0-33) scored  
221 lowest with only four facilities meeting the primary health facility density indicator and one meeting  
222 the nurse/ midwife density indicator (Table 2).

223 Within general service readiness, amenities scored 68%, basic equipment 63%, infection prevention  
224 76%, diagnostics capacity 81% and essential medicines and commodities 60%. Management & finance  
225 scored 50% (44-59), higher on governance (84%) and facility finances (60%) than staff support systems  
226 (46%), quality and safety systems (32%) and health information systems (29%). Clinical quality of care  
227 scored 57% (42-67) on record review and 37% (22-52) on direct observations of care. (Table 2)

228

229

230

231

232

233

234

235

236

237 *Table 2. HHFA-MAMI results: primary health care dimensions and MAMI availability & readiness*

238 *dimension*

239

240

241

## HHFA for primary health care

| HHFA for primary health care                  |                                                    |        |             | 3. MAMI availability & readiness      |             |
|-----------------------------------------------|----------------------------------------------------|--------|-------------|---------------------------------------|-------------|
| Dimensions and areas                          | Sub-areas (number of items)                        | Mean % | Mean %, IQR | Areas and sub-areas (number of items) | Mean %, IQR |
| <b>1. General service availability (n=15)</b> |                                                    |        |             | <b>51 (35-63)</b>                     |             |
| 1.1 Health infrastructure                     | Primary health facility density <sup>a</sup> (1)   | 27     |             | Infrastructure MAMI (1x5)             | 72 (60-80)  |
|                                               | Building structure and security conditions (8)     | 73     | 50 (41-53)  |                                       |             |
| 1.2 Health workforce                          | Health workforce density <sup>b</sup> (1)          | 13     |             | Health workforce MAMI (2x5)           | 61 (50-70)  |
|                                               | Staffing plan (3)                                  | 29     | 21 (0-33)   |                                       |             |
| 1.3 Services available                        | Outpatient service availability 24h/day (1)        | 67     |             | Availability: Assess MAMI (9x5)       | 53 (49-58)  |
|                                               | Availability of infant services (5)                | 95     | 81 (45-100) |                                       |             |
| <b>2. General service readiness (n=15)</b>    |                                                    |        |             | <b>69 (64-76)</b>                     |             |
| 2.1 Amenities                                 | Basic amenities main service area (12)             | 68     | 68 (63-75)  | Equipment and medicine MAMI (8x5)     | 32 (26-38)  |
| 2.2 Basic equipment                           | Basic equipment outpatient area functional (12)    | 63     | 63 (58-67)  |                                       |             |
| 2.3 Infection prevention                      | Standard precautions for infection prevention (11) | 76     | 76 (73-82)  | Guidelines and training MAMI (9x5)    | 23 (20-25)  |
| 2.4 Diagnostic capacity                       | Basic diagnostic capacity (9)                      | 81     | 81 (78-89)  |                                       |             |
| 2.5 Essential medicines and commodities       | Essential medicines (11)                           | 46     |             |                                       |             |
|                                               | Pharmaceutical commodity storage (6)               | 74     | 60 (46-73)  |                                       |             |
| <b>4. Management &amp; finance (n=15)</b>     |                                                    |        |             | <b>50 (44-59)</b>                     |             |
| 4.1 Facility governance/ management (6)       |                                                    |        | 84 (75-100) |                                       |             |
| 4.2 Facility finances and accounting (6)      |                                                    |        | 60 (50-67)  |                                       |             |
| 4.3 Staff support systems (6)                 |                                                    |        | 46 (33-50)  |                                       |             |
| 4.4 Quality and safety systems (5)            |                                                    |        | 32 (20-40)  |                                       |             |
| 4.5 Health information systems (8)            |                                                    |        | 29 (19-38)  |                                       |             |
| <b>5. Clinical quality of care</b>            |                                                    |        |             | <b>48</b>                             |             |
| 5.1 Record review (n=288)                     | Record review immunization (6)                     | 70     | 57 (42-67)  |                                       |             |
|                                               | Record review sick child clinic (6)                | 47     |             |                                       |             |
| 5.2 Direct observation of care (n=49)         | Service delivery observations (9)                  | 37     | 37 (22-52)  |                                       |             |
|                                               | General observations (5)                           | 36     |             |                                       |             |

243 *<sup>a</sup> compared to standard 1/10.000 people, <sup>b</sup> compared to standard 2.5 primary care workers/ 1000*  
244 *people*

245 Service-specific MAMI availability & readiness (objective 2)

246 Overall, the MAMI availability & readiness dimension scored 50% (45-53) on availability and 36% (34-  
247 39) on readiness. Infrastructure 72% (60-80) and health workforce 61% (50-70) scored higher than  
248 availability assess MAMI 53% (49-58), classify MAMI 17% (12-24) and treat MAMI 38% (35-40).  
249 Equipment scored 32% (26-38) and guidelines & training 23% (20-25) (Table 2).

250 Service utilisation (mean patient visits in 2022, IQR) was high in immunization programmes (1093, 389-  
251 1541) and postnatal care (785, 315-1319), compared to a mean of 11,073 (9079-26,098) patient  
252 curative visits in 2022 for all ages (Table 1). Scores per sub-area with mean service utilisation for each  
253 care contact point are shows in Figure 2.

254 *Figure 2. HHFA-MAMI assessment of mean service utilisation and availability & readiness for five care*  
255 *contact points in three districts in Senegal (n=15 PHC facilities)*

256 Nutritional care for infants u6m at five primary health care contact points (objective 3)

257 Comparisons of scores between the five contact points are visualised in a heatmap in Figure 3.

258 *Figure 3. Heat map MAMI availability & readiness items for five care contact points for infants u6m*  
259 *(n=15 PHC facilities)*

260 Infrastructure for MAMI scored high (72%): Delivery, postnatal care and sick child clinics were mostly  
261 open seven days a week, while immunization programmes were often provided weekly. Community  
262 health activities were provided monthly and were only offered in the two rural districts.

263 Health workforce, defined by the number of health providers available as well as their level of training,  
264 scored 61%. Delivery care, postnatal care and sick child clinics were provided by midwives or state  
265 nurses, while immunization service and community health were provided by lower trained health

266 providers. Numbers of health providers were lowest in sick child clinics (27% with three health  
267 providers or more), while community health had most service providers (13 on average).

268 MAMI “Assess”, including measurements such as weight, length or mid-upper-arm-circumference  
269 (MUAC), scored higher (53%) than “Classify” (17%) and “Treat” (38%). Health care providers reported  
270 that weight was taken at all clinical contact points, while only at delivery care a detailed  
271 anthropometric assessment was done, including weight and length (100% of facilities) and MUAC  
272 (93%). Midwives routinely observed breastfeeding after birth (100%), but not all of them reported to  
273 ask for breastfeeding problems (60%). At most care contact points, either breastfeeding observation or  
274 asking about breastfeeding was reported. Most (87%) midwives also reported conducting assessment  
275 of maternal nutrition status and maternal mental health, although the survey did not provide detailed  
276 information on how this was done. Infant physical examination was reported to be done by midwives  
277 (73% of the facilities at delivery, 67% at postnatal care) and state nurses at sick child clinics (80%), not  
278 at immunization programmes or in community health care.

279 MAMI “Classify” scored low overall (17%), meaning interpreting nutritional deficits with the usage of  
280 growth charts and classifying into for example normal/ moderate/ severe malnutrition. Midwives  
281 reported always diagnosing low birth weight (100%) and often prematurity (60%), while at sick child  
282 clinics infants were classified as wasted/non-wasted (80%) using weight for length, rarely MUAC (7%).  
283 At immunization programmes, weight was plotted in 40% of facilities. At postnatal care and  
284 community health, classification was rarely done.

285 MAMI “Treat” reported referral of at risk infants in 84% of at all five contact points at the 15 facilities,  
286 either to a different facility contact point (e.g. sick child clinic) or externally to the nearest district  
287 hospital or a tertiary centre (up to 300 kilometres away). Breastfeeding counselling was reported to  
288 happen at delivery and postnatal care (100%), immunization programmes (80%) and sick child clinics  
289 (93%). At over two third (67%) of the delivery and postnatal care contacts points and over half (60%) of

290 the sick child clinics, providers said to regularly prescribe infant formula, for example in case of low  
291 birth weight or when the mother self-report insufficient milk.

292 Explanation of growth charts to the mother was reported to happen at 27% of immunization  
293 programmes and 20% of sick child clinics. Medical treatment for infants with clinical conditions was  
294 provided at birth (93%), during postnatal care (87%) and during sick child clinics (100%). Community  
295 follow-up was mostly absent, with one exception where a midwife reported referral to community  
296 health workers for postnatal home visits.

297 Overall, MAMI equipment readiness at care contact points was 32%. In 93% of the 15 facilities, an  
298 adult scale was seen and all facilities had at least one functioning infant scale. Most (13) facilities had a  
299 functional analogue scale, five a digital, five a SECA-876 mother/ baby scale and at 12 a Salter scale.

300 The Salter hanging scale was generally used at community health care and at 26% of the immunization  
301 programmes. Health providers at most (12) facilities stated that their anthropometric equipment is  
302 usually calibrated.

303 A length board was observed in all 15 health facilities. This standardised UNICEF device was used in  
304 sick child clinics (100%) and immunization programs (53%). A standardised coloured MUAC tape was  
305 used in 100% of sick child clinics and 53% of immunization programmes. At delivery care and postnatal  
306 care an unrecommended practice was observed of using a simple measuring tape for taking both  
307 length and MUAC. Growth charts for weight and length were observed in 4% of the total contact  
308 points, although these were present in parent-held immunization cards which were not observed for  
309 this study. Laminated weight for height Z-score tables were observed, at consultation desks in  
310 postnatal care or sick child clinics (20%). In community health care in the two rural districts we saw a  
311 customised “look-up table” developed by the national nutrition advisory board (CNDN) to determine  
312 expected monthly weight gain (independent of the infants' age)[35]. Infant formula milk was not  
313 observed to be stocked at any of the facilities.

314 Guidelines and training relevant for MAMI scored low overall (23%). In over half (53%) of the facilities,  
315 IMCI-related guidelines were observed, often displayed on walls. Breastfeeding visual aids existed in  
316 the mother/ child record booklets, produced by the ministry of health and midwives reported using  
317 them widely for breastfeeding counselling after birth (93%) and during postnatal care (93%). Staff  
318 training at contact points over the previous three years was most frequently for immunization (53%),  
319 malnutrition (32%) and IMCI (8%). Guidelines or criteria for referral of infants with low birth weight or  
320 malnutrition were not seen.



## 321 Discussion

322 Primary health care facilities in Senegal have potential to care for infants u6m at risk of poor growth  
323 and development and their mothers. The HHFA-MAMI survey in 15 facilities found MAMI availability of  
324 50% and MAMI readiness of 36%. This is an important indication that the implementation of 2023  
325 WHO recommendations at PHC level is possible. Infrastructure, health workforce and equipment were  
326 available, but varied between service contact points. Among the three steps, infants were frequently  
327 **assessed** including for anthropometry, but not often **classified** as at risk, which is essential for  
328 adequate **treatment** as outpatients and referral for complications. Breastfeeding support was  
329 commonly provided, while the frequent prescription of infant formula showed a need for  
330 supplementary feeding guidance. Maternal mental health support was an observed gap. We found  
331 opportunities at each of the five contact points to implement WHO nutritional recommendations for at  
332 risk infants u6m.

## 333 Interpretation

334 The HHFA has been created to evaluate implementation of existing health policies, however, we found  
335 our HHFA-MAMI adaptation useful and potentially informative at the pre-implementation phase of  
336 WHO guidelines for infants u6m at risk of poor growth and development in Senegal. Current low  
337 scores could rapidly improve once the new WHO recommendations are formally rolled out and the  
338 survey is repeated in the future. Repeated readiness analysis has been used for evaluation purposes in  
339 more general maternal and child services in Senegal [36]. Similarly, for small and sick newborns,  
340 theNEST360 alliance has developed a readiness tool for repeated analysis of hospital care [37].  
341 Among the four general HHFA dimensions, general service readiness is most used in other studies. Our  
342 HHFA-MAMI general service readiness of 69% was slightly higher than other studies that assessed PHC  
343 readiness: 60.5% in Bangladesh and 61.5% in Mongolia [38],[39]. Our HHFA general service availability  
344 showed neither facility density nor health worker density meeting WHO standards in Senegal, which  
345 are important indicators in improving primary care coverage [40]. The dimension management &

346 finance was rarely assessed in other studies, while in a study on elderly care readiness, these aspects  
347 performed poorest [19]. Our low scores for health information systems (29%) and quality systems  
348 (32%) might need attention, implementing new services. The clinical quality of care dimension is  
349 essential in the HHFA, because readiness measured by only structural inputs has shown to poorly  
350 correlate with quality of care [41].

351 Previous nutrition service availability and readiness research for a wider age range (under 5 years)  
352 used similar items to our HHFA-MAMI tool, e.g. in primary health facilities in Nigeria: “offers child  
353 growth monitoring” (91.5%) and “diagnoses child malnutrition” (81.4%) [42]. A multi-country (n=11)  
354 nutrition-related readiness analysis at primary care facilities found overall low scores, comparable to  
355 our study: 30% “counselled on child growth” and 21% “plotted weight in growth chart” [43].  
356 Stakeholder consultation to developed a readiness indicator list focussed on nutritional quality of care  
357 for mothers and children under five years showed similarities to our tool, such as items “ask for  
358 feeding”, and “plotting the weight in a growth curve” [44].

359 Although our data did not allow us to calculate service coverage, the service utilisation gave some  
360 indication of how many infants and mothers are seen at the contact points. Combining service  
361 utilisation with readiness had earlier been described as a useful way to assess effective coverage [45].

#### 362 [Actionable findings to implement WHO guidelines at PHC contact points in Senegal](#)

363 At childbirth services in Senegal, midwives routinely measure birth weight, as in other contexts [46],  
364 and in line with the new WHO recommendations for at risk infants u6m, also measure length and  
365 MUAC, although some with unrecommended measuring tools.

366 At postnatal care, breastfeeding support was routinely provided in our study facilities, and extending  
367 this practice beyond the postnatal age up to 6m would be crucial for WHO guideline implementation  
368 [47]. A standardized breastfeeding assessment tool could help identify those at risk, needing closer  
369 breastfeeding support and follow-up [48]. Infant formula was reported to be frequently prescribed in

370 our study although not observed to be stocked in the health facilities and new WHO guidelines could  
371 support in supplementary feeding counselling.

372 Immunization services are expected to monitor children’s growth according to Senegal health policy  
373 yet do not always have the anticipated impact for at risk infants [49], due to a lack of proper use of  
374 growth charts [50]. There is an urgent need for better tools or lookup tables to simplify the usage of  
375 growth charts [51]. Besides weight, other anthropometric measurements are promising in infants u6m  
376 such as MUAC, although more evidence is needed to validate cut-off values [52] and to standardize  
377 MUAC tapes [53].

378 Sick child clinics in Senegal apply IMCI although concerns have been expressed regarding fidelity to  
379 guidelines [36]. The MAMI Care Pathway uses the IMCI structure “assess, classify, treat”, and aligning  
380 WHO guidelines implementation to IMCI would be beneficial. Maternal mental health support is an  
381 important element in the new WHO guideline that complements IMCI and could make a major  
382 contribution to improving nutritional outcomes for u6m children [54].

383 Community health care provides opportunities in detecting at risk infants, with larger numbers of  
384 health providers than at other care contact points in our study. To benefit from its advantages, task  
385 allocation is crucial [55] and there is a need for supervision and clinical mentoring to strengthen this  
386 service [56].

### 387 Limitations

388 Our research is the first effort using the HHFA for u6m infant nutrition assessment, making it novel,  
389 though less comparable to similar studies using older tools, which is a limitation. Another limitation is  
390 that cut-off points for readiness scores have not yet been defined: what overall score is ‘good enough’  
391 for a particular facility. Future research is needed to validate the HHFA for various settings. However,  
392 our HHFA-MAMI tool showed proof of concept in this study and could be tested and validated in wider  
393 context.

394 The HHFA-MAMI captures mainly nutritional items, that do not necessarily cover all the risk factors  
395 underlying infant malnutrition [57]. However, a strength of our tool is its parsimonious collection of  
396 137 general and 42 MAMI items from PHC facilities, that require only 1-2 days of data collection by  
397 one or two people.

398 Finally, we acknowledge that our sample size was small to compare scores between districts. However,  
399 our data are critical to inform sample size calculations and logistical considerations for future more  
400 analytical service-readiness studies.

#### 401 [Generalisability](#)

402 A recent stakeholder consultation in 42 countries revealed a perceived need for improved detection  
403 and care for at risk infants u6m [58], which will be accelerated by the 2023 WHO malnutrition  
404 guidelines. Senegal was mentioned as an exemplar country in stunting reduction, because of its  
405 effective implementation of nutrition policy and multisectoral approach [59]. The HHFA-MAMI survey  
406 tool we developed and future MAMI implementation lessons learned from Senegal might therefore  
407 inspire countries in the region and beyond.

#### 408 [Conclusion](#)

409 Primary health facilities in Senegal have potential to care for infants u6m at risk of poor growth and  
410 development with high general PHC readiness and frequent use of care contact points for infants u6m  
411 (delivery and postnatal care, immunization programmes, sick child clinics and community health care).  
412 Our HHFA-MAMI survey found suboptimal MAMI availability and readiness, but many items are in  
413 place or could be strengthened, implementing WHO-recommended nutritional care for at risk infants.

#### 414 [Acknowledgements](#)

415 We greatly thank all health care providers we interviewed, who welcomed us in their working place  
416 and homes and were willing to share information. We thank the mothers of the infants who allowed  
417 us to observe their consultation and whose information we extracted from registers and reports. We

418 thank the administrative heads who facilitated the study in each of the three districts in Senegal. A  
419 huge thanks to Sheikh Jallow who travelled to all of the 15 health facilities to patiently assist in data  
420 collection. *“Electronic data solutions were provided by LSHTM Global Health Analytics*  
421 *(odk.lshtm.ac.uk).”*

422

## 423 References

- 424 1. Keats EC, Das JK, Salam RA, Lassi ZS, Imdad A, Black RE, et al. Effective interventions to address  
425 maternal and child malnutrition: an update of the evidence. *The Lancet Child & Adolescent Health.*  
426 2021;5(5):367-84.
- 427 2. Kerac M, McGrath M. Management of Acute Malnutrition in Infants under 6 Months of Age  
428 (book chapter, chapter 14). In: Karakochuk CD, Whitfield, K.C., Green, T.J., & Kraemer, K., editor. *The*  
429 *Biology of the First 1,000 Days*: CRC Press; 2017. p. 207-20.
- 430 3. Victora CG, Christian P, Vdaletti LP, Gatica-Domínguez G, Menon P, Black RE. Revisiting  
431 maternal and child undernutrition in low-income and middle-income countries: variable progress  
432 towards an unfinished agenda. *The Lancet.* 2021;397(10282):1388-99.
- 433 4. Lawn JE, Ohuma EO, Bradley E, Idueta LS, Hazel E, Okwaraji YB, et al. Small babies, big risks:  
434 global estimates of prevalence and mortality for vulnerable newborns to accelerate change and  
435 improve counting. *Lancet.* 2023;401(10389):1707-19.
- 436 5. Kerac M, James PT, McGrath M, Brennan E, Opondo C, Frison S. Infant malnutrition in low-and  
437 middle-income countries: assessment and prevalence of small and nutritionally at-risk infants aged  
438 under 6 months in 54 Demographic & Health Survey datasets. *medRxiv.* 2021.
- 439 6. Mertens A, Benjamin-Chung J, Colford JM, Jr., Hubbard AE, van der Laan MJ, Coyle J, et al.  
440 Child wasting and concurrent stunting in low- and middle-income countries. *Nature.*  
441 2023;621(7979):558-67.
- 442 7. Grijalva-Eternod CS, Kerac M, McGrath M, Wilkinson C, Hirsch JC, Delchevalerie P, et al.  
443 Admission profile and discharge outcomes for infants aged less than 6 months admitted to inpatient  
444 therapeutic care in 10 countries. A secondary data analysis. *Matern Child Nutr.* 2017;13(3).
- 445 8. Walker SP, Wachs TD, Meeks Gardner J, Lozoff B, Wasserman GA, Pollitt E, et al. Child  
446 development: risk factors for adverse outcomes in developing countries. *The Lancet.*  
447 2007;369(9556):145-57.
- 448 9. Kirolos A, Goyheneix M, Kalmus Elias M, Chisala M, Lissauer S, Gladstone M, et al.  
449 Neurodevelopmental, cognitive, behavioural and mental health impairments following childhood  
450 malnutrition: a systematic review. *BMJ Glob Health.* 2022;7(7).
- 451 10. Grey K, Gonzales GB, Abera M, Lelijveld N, Thompson D, Berhane M, et al. Severe malnutrition  
452 or famine exposure in childhood and cardiometabolic non-communicable disease later in life: a  
453 systematic review. *BMJ Glob Health.* 2021;6(3).
- 454 11. WHO. Guidelines on the prevention and management of wasting and nutritional oedema  
455 (acute malnutrition) in infants and children under 5 years. 2023 [cited 2023 Dec 12]. Available from:  
456 <https://www.who.int/publications/i/item/9789240082830>.
- 457 12. Kerac M, Mwangome M, McGrath M, Haider R, Berkley JA. Management of acute malnutrition  
458 in infants aged under 6 months (MAMI): Current issues and future directions in policy and research.  
459 *Food and Nutrition Bulletin.* 2015;36(1).
- 460 13. Marie M. MAMI and the 2023 WHO recommendations: We’re talking the same talk! *Field*  
461 *Exchange* 71. 2023;71:6.

- 462 14. ENN, LSHTM, Collaborators. MAMI Care Pathway Package, Version 3 (2021) 2021 [updated  
463 2021/05/04/. Available from: <https://www.ennonline.net/mamicarepathway>.
- 464 15. Kelsey Grey EB, Marko Kerac, Marie McGrath. The MAMI Care Pathway Package: A resource to  
465 support the management of small and nutritionally at-risk infants under six months of age and their  
466 mothers (MAMI). South Sudan Medical Journal. 2021;Vol 14. .
- 467 16. WHO. Harmonized Health Facility Assessment. 2022 [cited 2022 Dec 13]. Available from:  
468 <https://www.who.int/data/data-collection-tools/harmonized-health-facility-assessment>.
- 469 17. Pandey AR, Adhikari B, Lamichhane B, Joshi D, Regmi S, Lal BK, et al. Service availability and  
470 readiness for basic emergency obstetric and newborn care: Analysis from Nepal Health Facility Survey  
471 2021. PLoS One. 2023;18(8):e0282410.
- 472 18. Ammoun R, Wami WM, Otieno P, Schultsz C, Kyobutungi C, Asiki G. Readiness of health  
473 facilities to deliver non-communicable diseases services in Kenya: a national cross-sectional survey.  
474 BMC Health Serv Res. 2022;22(1):985.
- 475 19. Ssensamba JT, Mukuru M, Nakafeero M, Ssenyonga R, Kiwanuka SN. Health systems readiness  
476 to provide geriatric friendly care services in Uganda: a cross-sectional study. BMC geriatrics.  
477 2019;19(1):1-13.
- 478 20. ANSD. Sénégal : Enquête Continue sur la Prestation des Services de Soins de Santé (ECPSS)  
479 2019. Rapport des indicateurs clés. The DHS Program ICF; 2020.
- 480 21. ANSD. Enquête Démographique et Sanitaire du Sénégal 2018 Dakar, Senegal: Republique du  
481 Sénégal; 2019.
- 482 22. Gera T, Shah D, Garner P, Richardson M, Sachdev HS. Integrated management of childhood  
483 illness (IMCI) strategy for children under five. Cochrane Database Syst Rev. 2016(6):CD010123.
- 484 23. MSAS. Plan Stratégique Multisectoriel de la Nutrition du Sénégal. Dakar, Senegal: Republique  
485 du Sénégal; 2016.
- 486 24. MSAS. Enquete Nutritionnelle Nationale Utilisant la Méthodologie SMART. Dakar, Senegal:  
487 Republique du Sénégal; 2016.
- 488 25. MSAS. Protocole National de Prise en Charge de la Malnutrition Aigue. Dakar, Senegal:  
489 Republique du Sénégal; 2013.
- 490 26. van Immerzeel TD, Camara MD, Deme Ly I, de Jong RJ. Inpatient and outpatient treatment for  
491 acute malnutrition in infants under 6 months; a qualitative study from Senegal. BMC Health Serv Res.  
492 2019;19(1):69.
- 493 27. EQUATOR. Enhancing the QUALity and Transparency Of health Research. 2023 [cited 2023 Oct  
494 10]. Available from: <https://www.equator-network.org/reporting-guidelines/>.
- 495 28. MSAS. Plan National de Développement Sanitaire et Social du Sénégal 2019- 2028. Dakar,  
496 Senegal: Republique du Sénégal; 2019.
- 497 29. WHO. Service availability and readiness assessment (SARA): an annual monitoring system for  
498 service delivery: reference manual2013 [cited 2022 Nov 23]. Available from:  
499 [https://www.who.int/data/data-collection-tools/service-availability-and-readiness-assessment-\(sara\)](https://www.who.int/data/data-collection-tools/service-availability-and-readiness-assessment-(sara)).
- 500 30. WHO. Global Health Observatory data repository. 2018 [cited 2023 Oct 17]. Available from:  
501 <https://apps.who.int/gho/data/?theme=main>.
- 502 31. Adedoyin O, Ogunyemi MRB, Adedayo E, Ojo, Sarah B, Welch, Oluwatosin O, Onasanya,  
503 Victoria O, Yesufu, Abisola O, Omotayo, Lisa R, Hirschhorn. Provider and facility readiness for age-  
504 friendly health services for older adults in primary health care centres in southwest, Nigeria. 2023.
- 505 32. Chaulagain DR, Malqvist M, Wrammert J, Gurung R, Brunell O, Basnet O, et al. Service  
506 readiness and availability of perinatal care in public hospitals - a multi-centric baseline study in Nepal.  
507 BMC Pregnancy Childbirth. 2022;22(1):842.
- 508 33. Hartung C. Open Data Kit: Tools to Build Information Services for Developing Regions. In: ICTD,  
509 editor. London, UK2010.
- 510 34. MicrosoftCorporation. Microsoft Excel. 2402 ed2018.
- 511 35. CNDN. Table poids attendu. 2019 [cited 2023 Oct 17]. Available from: [https://cndn.sn/bon-a-](https://cndn.sn/bon-a-savoir/enfant/)  
512 [savoir/enfant/](https://cndn.sn/bon-a-savoir/enfant/).

- 513 36. Leslie HH, Hategeka C, Ndour PI, Nimako K, Dieng M, Diallo A, et al. Stability of healthcare  
514 quality measures for maternal and child services: Analysis of the continuous service provision  
515 assessment of health facilities in Senegal, 2012-2018. *Trop Med Int Health*. 2022;27(1):68-80.
- 516 37. Penzias RE, Bohne C, Ngwala SK, Zimba E, Lufesi N, Rashid E, et al. Health facility assessment of  
517 small and sick newborn care in low- and middle-income countries: systematic tool development and  
518 operationalisation with NEST360 and UNICEF. *BMC Pediatr*. 2024;23(Suppl 2):655.
- 519 38. Shawon MSR, Adhikary G, Ali MW, Shamsuzzaman M, Ahmed S, Alam N, et al. General service  
520 and child immunization-specific readiness assessment of healthcare facilities in two selected divisions  
521 in Bangladesh. *BMC Health Serv Res*. 2018;18(1):39.
- 522 39. Jigjidsuren A, Byambaa T, Altangerel E, Batbaatar S, Saw YM, Kariya T, et al. Free and universal  
523 access to primary healthcare in Mongolia: the service availability and readiness assessment. *BMC*  
524 *Health Serv Res*. 2019;19(1):129.
- 525 40. Ahmat A, Asamani JA, Abdou Illou MM, Millogo JJS, Okoroafor SC, Nabyonga-Orem J, et al.  
526 Estimating the threshold of health workforce densities towards universal health coverage in Africa.  
527 *BMJ Glob Health*. 2022;7(Suppl 1).
- 528 41. Leslie HH, Sun Z, Kruk ME. Association between infrastructure and observed quality of care in 4  
529 healthcare services: A cross-sectional study of 4,300 facilities in 8 countries. *PLoS Med*.  
530 2017;14(12):e1002464.
- 531 42. Oluwole EO, Adeniran A, Chieme CF, Ojo OY, Akinyinka MR, Ilesanmi MM, et al. Maternal and  
532 child health service readiness among primary health care facilities in Ekiti, Nigeria. *Afr J Prim Health*  
533 *Care Fam Med*. 2022;14(1):e1-e7.
- 534 43. Ramadan M, Muthee TB, Okara L, Feil C, Villar Uribe M. Existing gaps and missed opportunities  
535 in delivering quality nutrition services in primary healthcare: a descriptive analysis of patient  
536 experience and provider competence in 11 low-income and middle-income countries. *BMJ Open*.  
537 2023;13(2):e064819.
- 538 44. King SE, Sheffel A, Heidkamp R, Xu YY, Walton S, Munos MK. Advancing nutrition  
539 measurement: Developing quantitative measures of nutrition service quality for pregnant women and  
540 children in low- and middle-income country health systems. *Matern Child Nutr*. 2022;18(1):e13279.
- 541 45. Wang W, Mallick L, Allen C, Pullum T. Effective coverage of facility delivery in Bangladesh,  
542 Haiti, Malawi, Nepal, Senegal, and Tanzania. *PLoS One*. 2019;14(6):e0217853.
- 543 46. Kong S, Day LT, Zaman SB, Peven K, Salim N, Sunny AK, et al. Birthweight: EN-BIRTH multi-  
544 country validation study. *BMC Pregnancy and Childbirth*. 2021;21(1):1-19.
- 545 47. Rana R, McGrath M, Gupta P, Thakur E, Kerac M. Feeding Interventions for Infants with Growth  
546 Failure in the First Six Months of Life: A Systematic Review. *Nutrients*. 2020;12(7).
- 547 48. Brugaletta C, Le Roch K, Saxton J, Bizouerne C, McGrath M, Kerac M. Breastfeeding assessment  
548 tools for at-risk and malnourished infants aged under 6 months old: a systematic review. *F1000Res*.  
549 2020;9:1310.
- 550 49. Ashworth A, Shrimpton R, Jamil K. Growth monitoring and promotion: review of evidence of  
551 impact. *Matern Child Nutr*. 2008(4):86-117.
- 552 50. Ahmad UN, Yiwombe M, Chisepo P, Cole TJ, Heikens GT, Kerac M. Interpretation of World  
553 Health Organization growth charts for assessing infant malnutrition: a randomised controlled trial. *J*  
554 *Paediatr Child Health*. 2014;50(1):32-9.
- 555 51. Pannapat Amy Chanyarungrojn NL, Amelia Crampin, Lawrence Nkhwazi, Steffen Geis, Moffat  
556 Nyirenda, Marko Kerac. Tools for assessing child and adolescent stunting: Lookup tables, growth charts  
557 and a novel appropriate-technology "MEIRU" wallchart - a diagnostic accuracy study. 2023.
- 558 52. Hoehn C, Lelijveld N, Mwangome M, Berkley JA, McGrath M, Kerac M. Anthropometric Criteria  
559 for Identifying Infants Under 6 Months of Age at Risk of Morbidity and Mortality: A Systematic Review.  
560 *Clinical Medicine Insights: Pediatrics*. 2021;15:11795565211049904.
- 561 53. Ritu Rana HB, Marie McGrath, Marko Kerac, Mark Myatte. Mid-Upper Arm Circumference  
562 Tapes and Measurement Discrepancies: Time to Standardize Product specifications and Reporting.  
563 *Global Health: Science and Practice*. 2021;9.

- 564 54. Tol WA, Greene MC, Lasater ME, Le Roch K, Bizouerne C, Purgato M, et al. Impact of maternal  
565 mental health interventions on child-related outcomes in low- and middle-income countries: a  
566 systematic review and meta-analysis. *Epidemiol Psychiatr Sci.* 2020;29:e174.
- 567 55. Kok MC, Ormel H, Broerse JEW, Kane S, Namakhoma I, Otiso L, et al. Optimising the benefits of  
568 community health workers' unique position between communities and the health sector: A  
569 comparative analysis of factors shaping relationships in four countries. *Glob Public Health.*  
570 2017;12(11):1404-32.
- 571 56. Daka DW, Wordofa MA, Berhanu D, Persson LA, Woldie M. Quality of sick child management  
572 by health extension workers: role of a complex improvement intervention. *BMC Health Serv Res.*  
573 2023;23(1):165.
- 574 57. Kerac M, Frison S, Connell N, Page B, McGrath M. Informing the management of acute  
575 malnutrition in infants aged under 6 months (MAMI): risk factor analysis using nationally-  
576 representative demographic & health survey secondary data. *PeerJ.* 2019;6:e5848.
- 577 58. van Immerzeel TD, Diagne M, Deme/Ly I, Murungi AE, Diouf S, Kerac M, et al. Implementing a  
578 Care Pathway for small and nutritionally at-risk infants under six months of age: A multi-country  
579 stakeholder consultation. *Matern Child Nutr.* 2022;19(1):e13455.
- 580 59. Brar S, Akseer N, Sall M, Conway K, Diouf I, Everett K, et al. Drivers of stunting reduction in  
581 Senegal: a country case study. *Am J Clin Nutr.* 2020;112(Suppl 2):860S-74S.

582

## 583 [Supporting information captions](#)

584 *S1 Appendix. HHFA-MAMI tool complete list of items (English and French)*

585

586



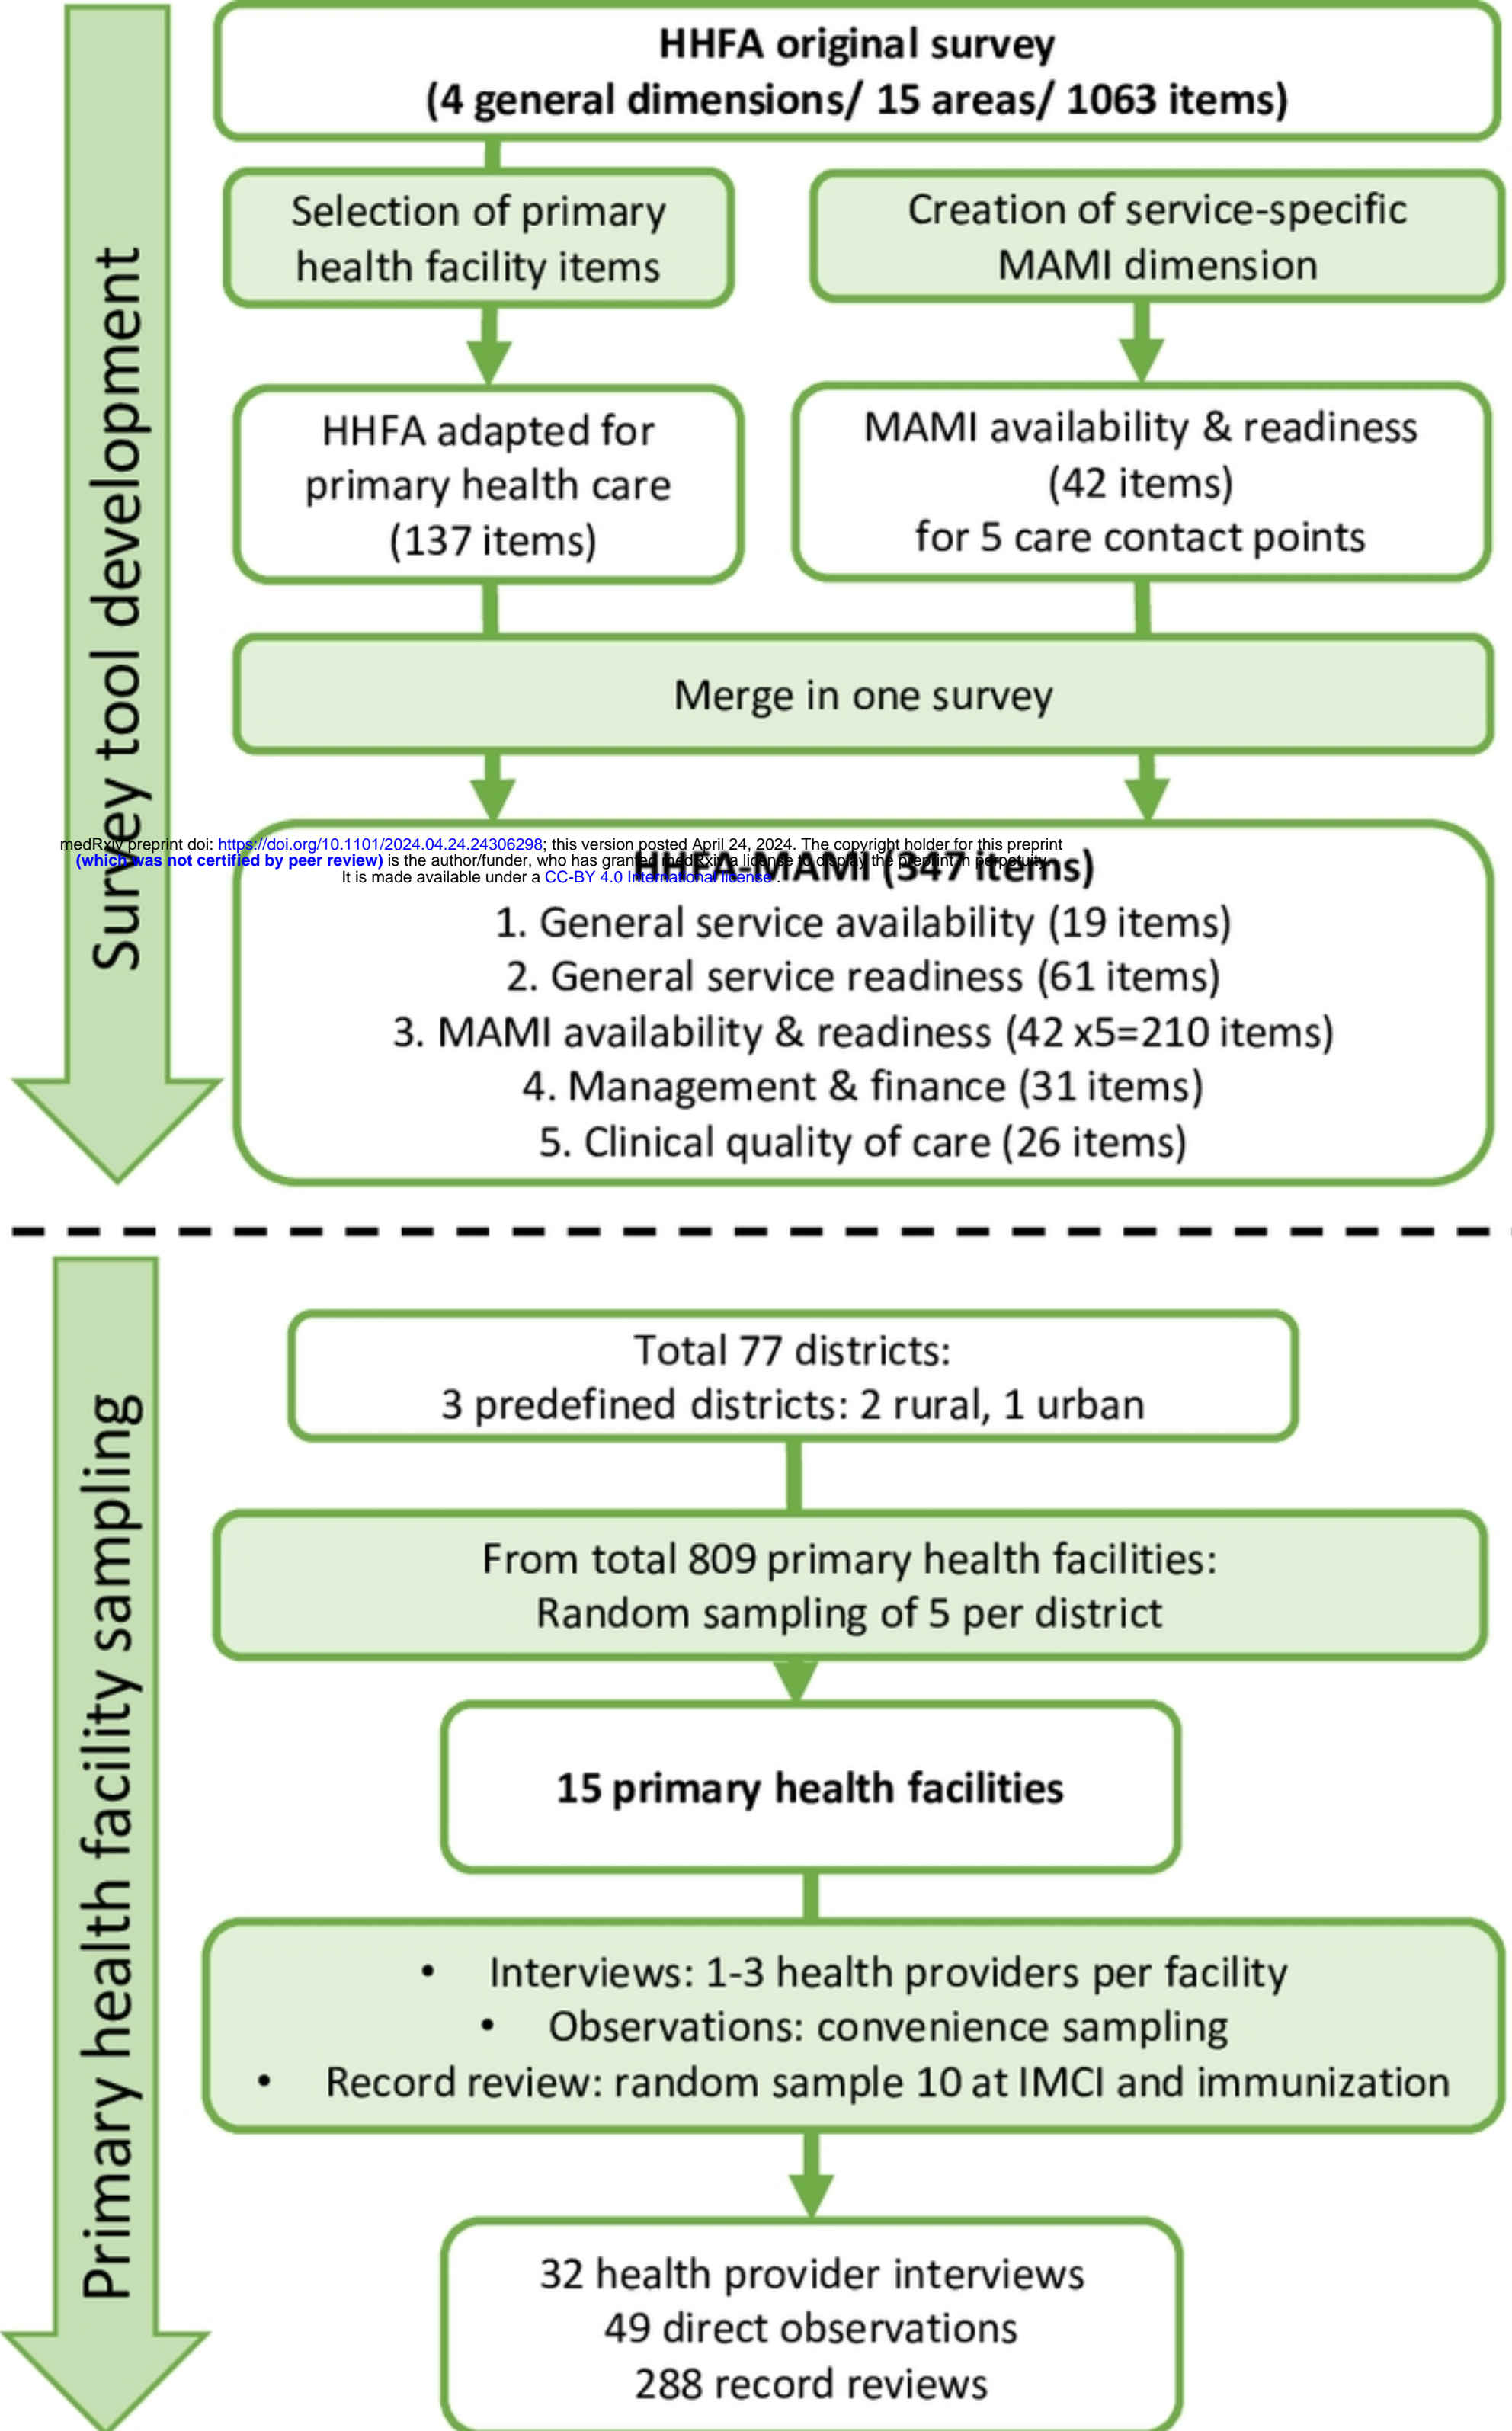

medRxiv preprint doi: <https://doi.org/10.1101/2024.04.24.24306298>; this version posted April 24, 2024. The copyright holder for this preprint (which was not certified by peer review) is the author/funder, who has granted medRxiv a license to display the preprint in perpetuity. It is made available under a [CC-BY 4.0 International license](https://creativecommons.org/licenses/by/4.0/).

Figure 1

## Service utilisation and MAMI availability & readiness at five care contact points for infants u6m in Senegal (n=15 primary health facilities)

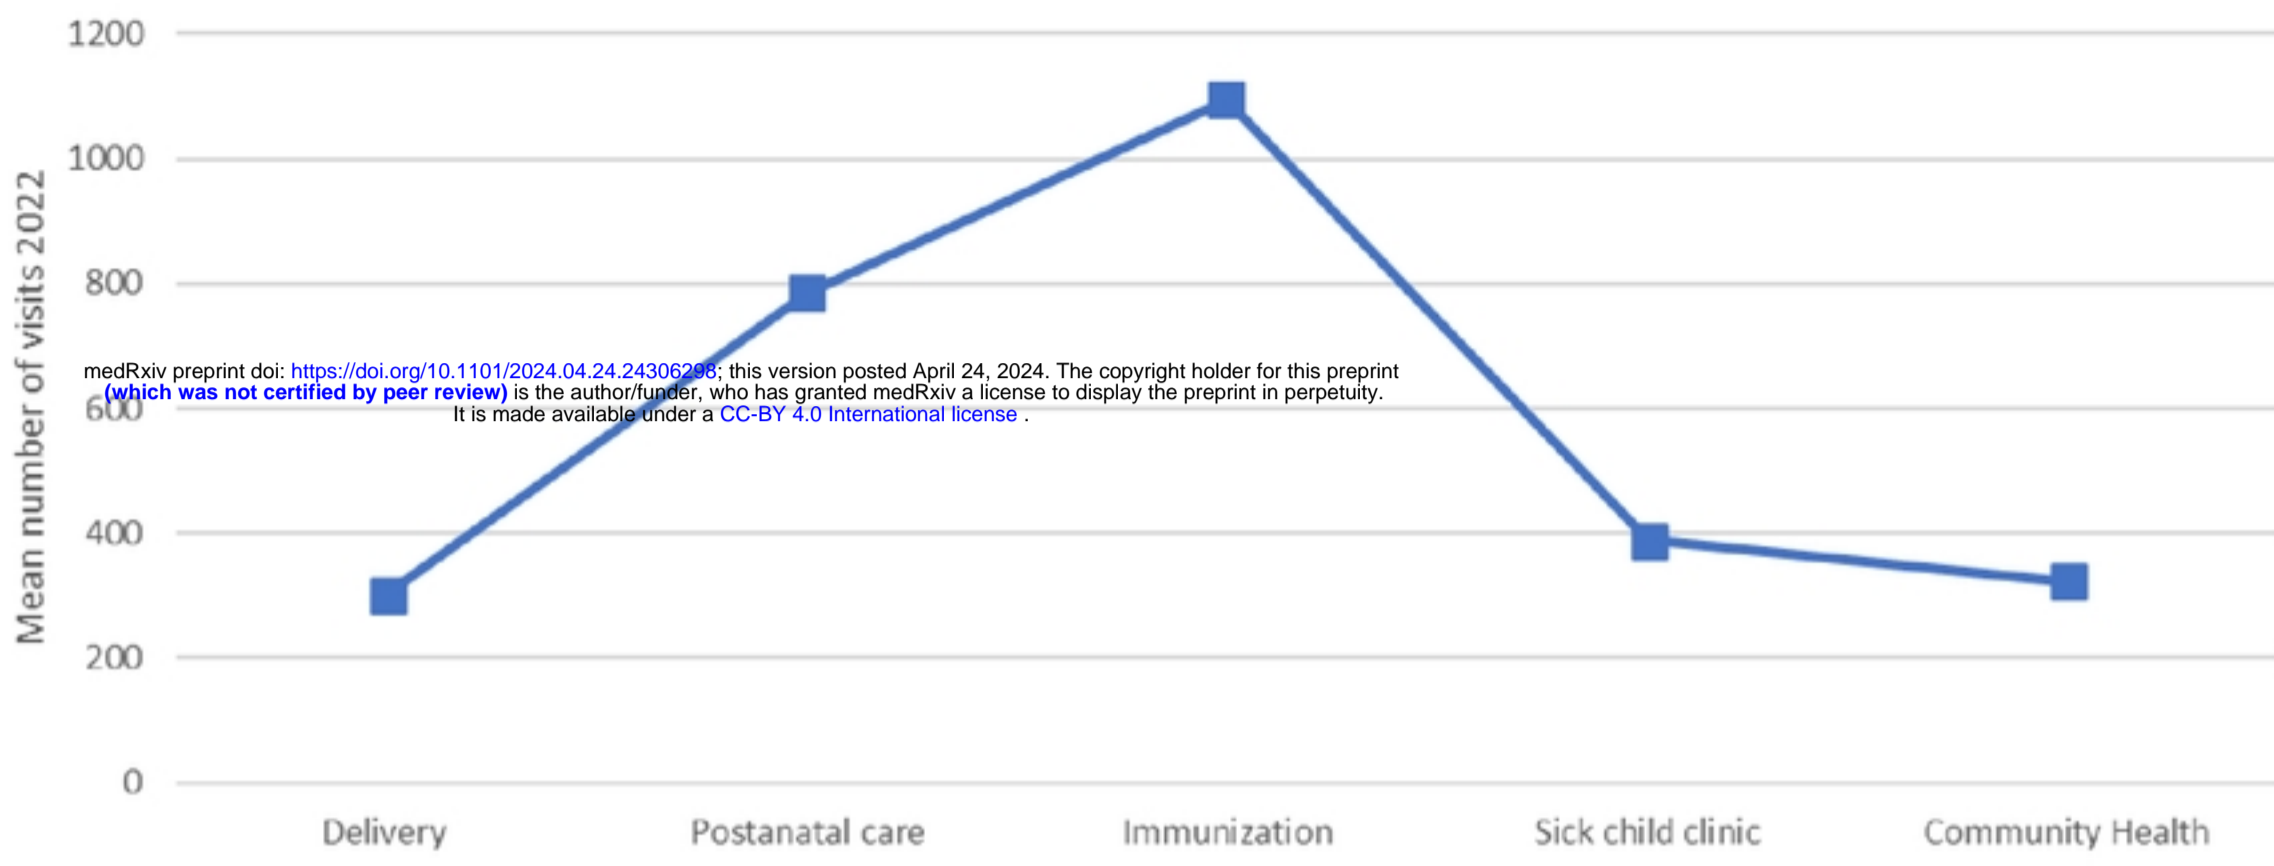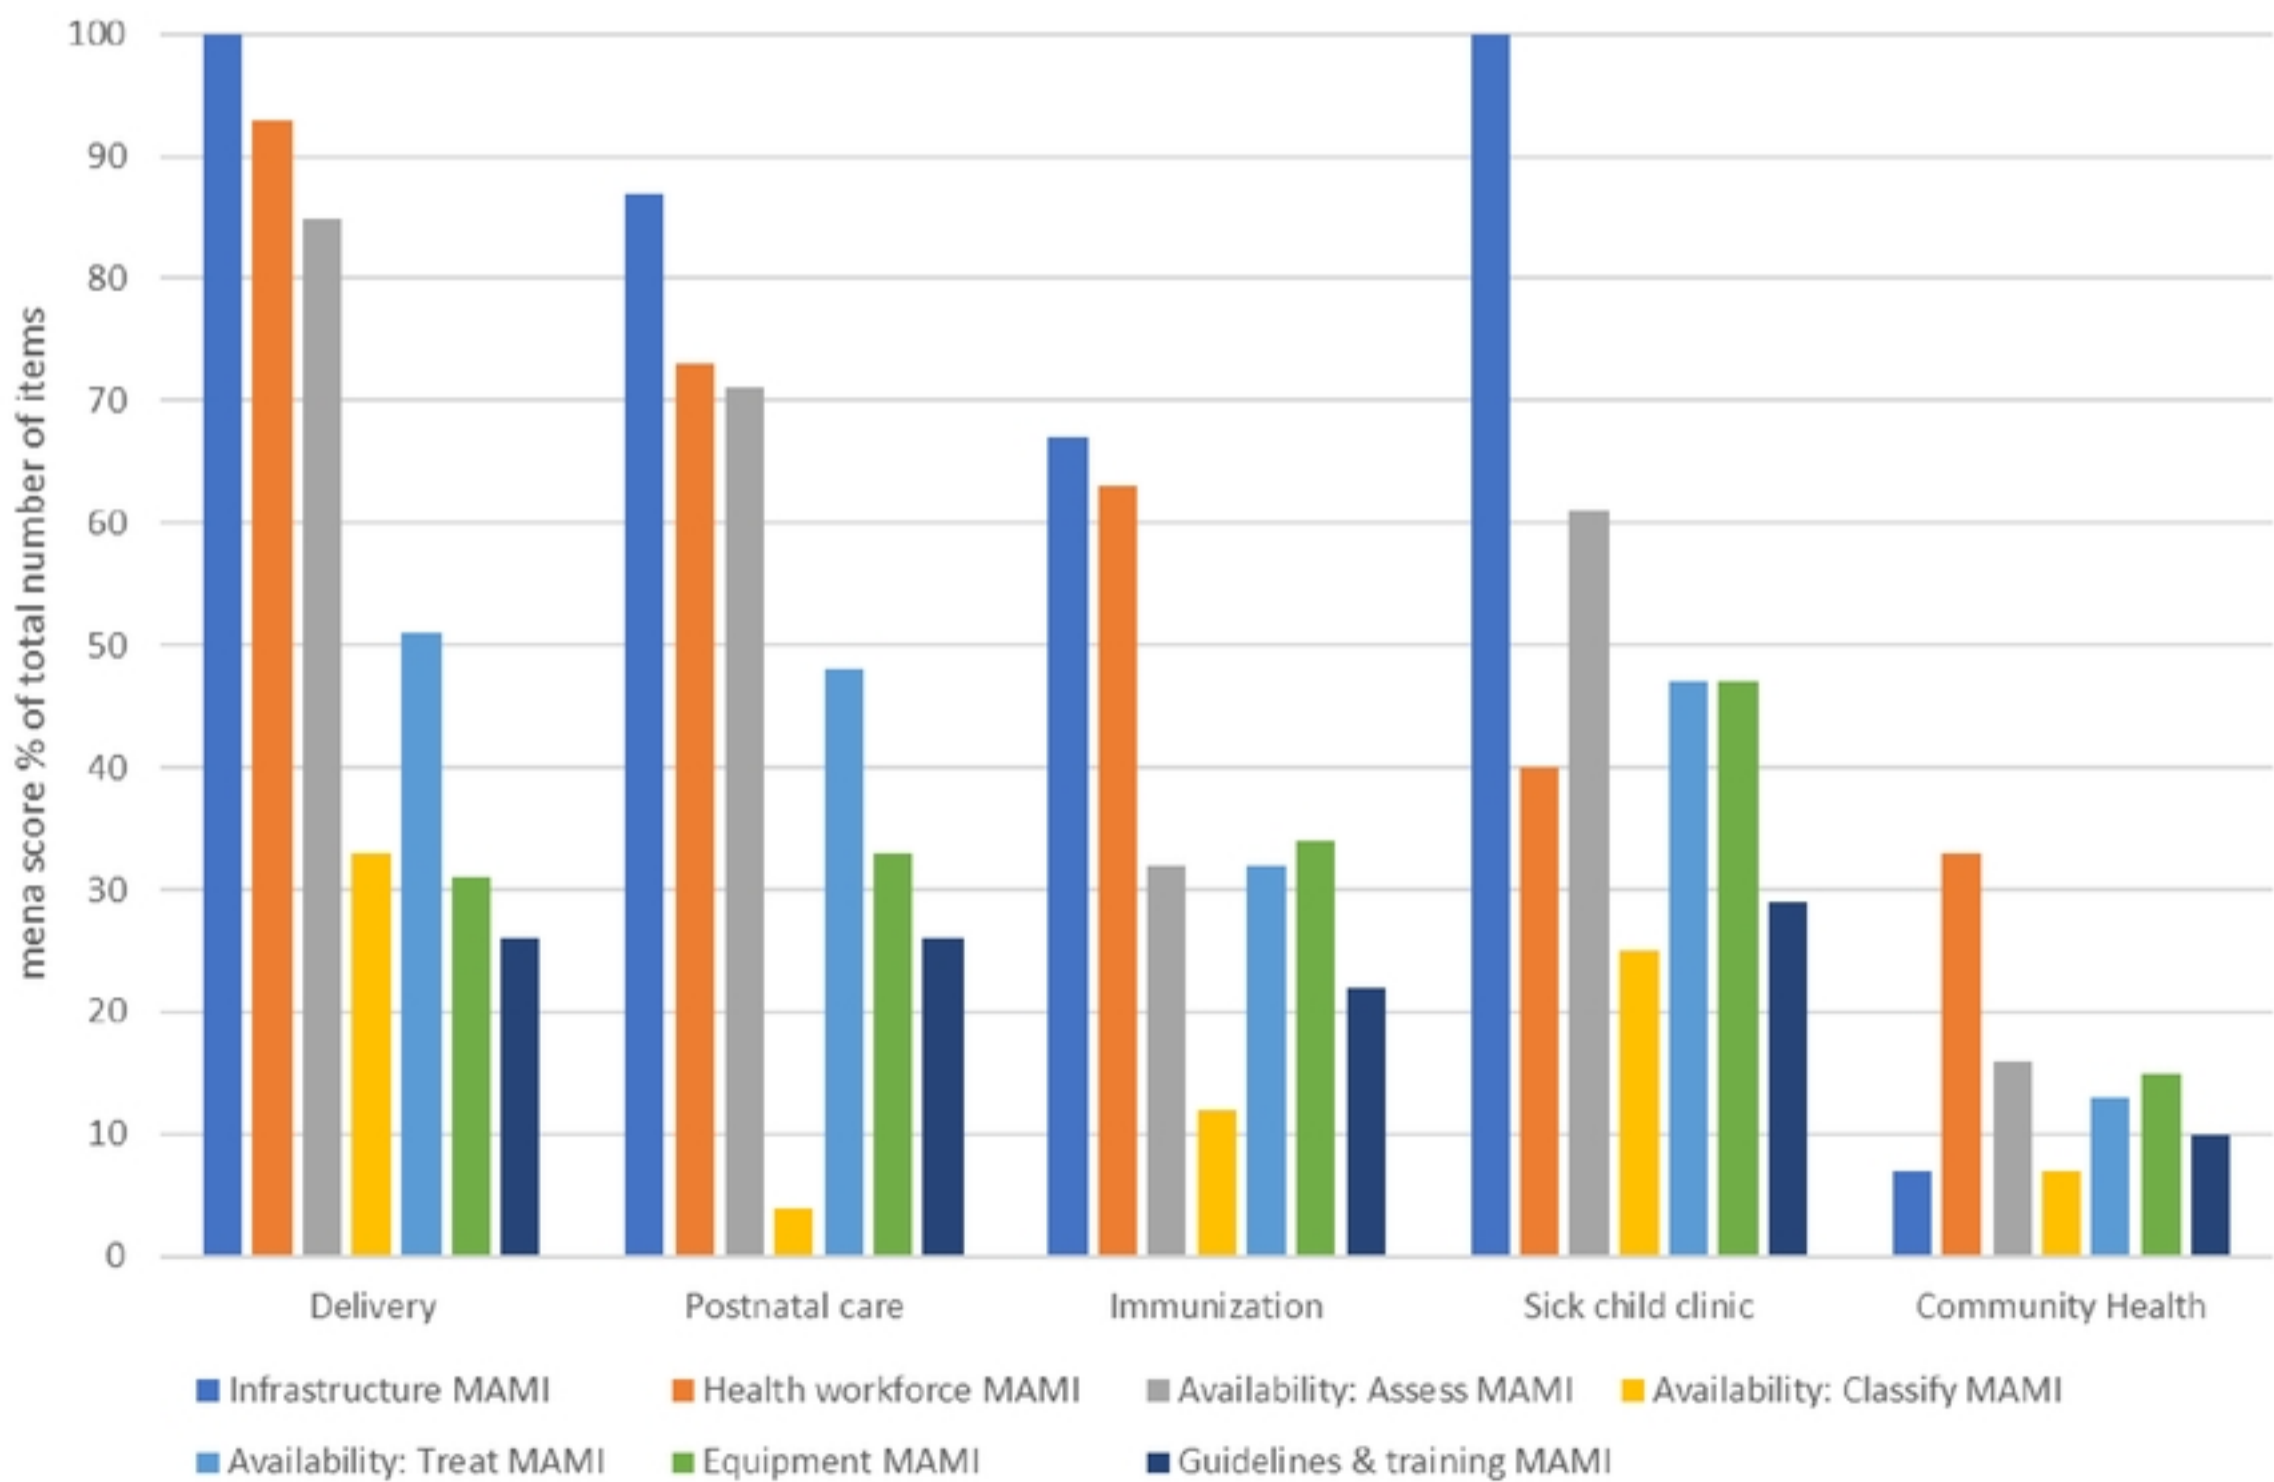

Figure 2

| Sub-areas                  | Summary of items                           | Delivery % | Postnatal care % | Immunization % | Sick child clinic % | Community health % | Total %   |
|----------------------------|--------------------------------------------|------------|------------------|----------------|---------------------|--------------------|-----------|
| Infrastructure             | open minimum 5 days/ week                  | 100        | 87               | 67             | 100                 | 7                  |           |
| MAMI                       | <b>Total %</b>                             | <b>100</b> | <b>87</b>        | <b>67</b>      | <b>100</b>          | <b>7</b>           | <b>72</b> |
| Health workforce           | state nurse or midwife present             | 100        | 100              | 47             | 53                  | 0                  | 60        |
| MAMI                       | mimum 3 service providers                  | 87         | 47               | 80             | 27                  | 67                 | 61        |
|                            | <b>Total %</b>                             | <b>93</b>  | <b>73</b>        | <b>63</b>      | <b>40</b>           | <b>33</b>          | <b>61</b> |
| Availability:              | take weight                                | 100        | 100              | 100            | 100                 | 67                 | 93        |
| Assess MAMI                | check danger signs                         | 67         | 33               | 27             | 60                  | 7                  | 39        |
|                            | ask for feeding difficulties               | 60         | 67               | 13             | 27                  | 20                 | 37        |
|                            | observe breastfeeding                      | 100        | 87               | 47             | 93                  | 20                 | 69        |
|                            | take MUAC                                  | 93         | 53               | 13             | 7                   | 13                 | 36        |
|                            | take length                                | 100        | 67               | 53             | 100                 | 7                  | 65        |
|                            | conduct infant physical exam               | 73         | 67               | 0              | 80                  | 0                  | 44        |
|                            | check maternal mental health               | 87         | 73               | 20             | 53                  | 7                  | 48        |
|                            | check maternal nutritional status          | 87         | 93               | 13             | 27                  | 7                  | 45        |
|                            | <b>Total %</b>                             | <b>85</b>  | <b>71</b>        | <b>32</b>      | <b>61</b>           | <b>16</b>          | <b>53</b> |
| Availability:              | detect underweight                         | 7          | 0                | 40             | 13                  | 13                 | 15        |
| Classify MAMI              | detect LBW                                 | 100        | 7                | 0              | 27                  | 0                  | 27        |
|                            | detect prematurity/ SGA                    | 60         | 0                | 0              | 0                   | 0                  | 12        |
|                            | detect wasting                             | 0          | 7                | 20             | 80                  | 13                 | 24        |
|                            | detect stunting                            | 0          | 7                | 0              | 7                   | 7                  | 4         |
|                            | <b>Total %</b>                             | <b>33</b>  | <b>4</b>         | <b>12</b>      | <b>25</b>           | <b>7</b>           | <b>16</b> |
| Availability:              | explain growth charts                      | 0          | 0                | 27             | 20                  | 13                 | 12        |
| Treat MAMI                 | breastfeeding counselling                  | 100        | 100              | 80             | 93                  | 20                 | 79        |
|                            | refer for complications                    | 60         | 100              | 93             | 100                 | 67                 | 84        |
|                            | close follow-up                            | 67         | 20               | 20             | 0                   | 0                  | 21        |
|                            | medical treatment                          | 93         | 87               | 27             | 100                 | 0                  | 61        |
|                            | prescribe formula                          | 67         | 67               | 7              | 60                  | 0                  | 40        |
|                            | mother psychosocial support                | 20         | 7                | 0              | 0                   | 0                  | 5         |
|                            | community health follow-up                 | 0          | 7                | 0              | 0                   | 0                  | 1         |
|                            | <b>Total %</b>                             | <b>51</b>  | <b>48</b>        | <b>32</b>      | <b>47</b>           | <b>13</b>          | <b>38</b> |
| Equipment MAMI             | infant scale                               | 87         | 93               | 100            | 100                 | 67                 | 89        |
|                            | digital inf scale                          | 33         | 33               | 27             | 33                  | 0                  | 25        |
|                            | adult scale                                | 13         | 7                | 7              | 13                  | 0                  | 8         |
|                            | length board                               | 13         | 7                | 53             | 100                 | 7                  | 36        |
|                            | MUAC tape                                  | 87         | 100              | 53             | 100                 | 47                 | 77        |
|                            | any growth charts                          | 0          | 0                | 13             | 7                   | 0                  | 4         |
|                            | Z-score tables                             | 13         | 20               | 20             | 20                  | 0                  | 15        |
|                            | milk supplement                            | 0          | 0                | 0              | 0                   | 0                  | 0         |
|                            | <b>Total %</b>                             | <b>31</b>  | <b>33</b>        | <b>34</b>      | <b>47</b>           | <b>15</b>          | <b>32</b> |
| Guidelines & training MAMI | IMCI guidelines seen                       | 7          | 7                | 0              | 53                  | 0                  | 13        |
|                            | Breastfeeding guidelines/ visual aids seen | 93         | 93               | 20             | 13                  | 20                 | 48        |
|                            | Malnutrition guidelines/ job aids seen     | 13         | 20               | 33             | 33                  | 20                 | 24        |
|                            | LBW/ infant referral guidelines seen       | 0          | 0                | 0              | 7                   | 0                  | 1         |
|                            | staff trained in IMCI past <3y             | 0          | 0                | 20             | 20                  | 0                  | 8         |
|                            | staff trained in immunization past <3y     | 73         | 67               | 67             | 47                  | 13                 | 53        |
|                            | staff trained in malnutrition past <3y     | 20         | 20               | 33             | 60                  | 27                 | 32        |
|                            | staff trained maternal mental health       | 0          | 0                | 0              | 0                   | 0                  | 0         |
|                            | <b>Total %</b>                             | <b>26</b>  | <b>26</b>        | <b>22</b>      | <b>29</b>           | <b>10</b>          | <b>23</b> |

medRxiv preprint doi: <https://doi.org/10.1101/2024.04.24.24306298>; this version posted April 24, 2024. The copyright holder for this preprint (which was not certified by peer review) is the author/funder, who has granted medRxiv a license to display the preprint in perpetuity. It is made available under a [CC-BY 4.0 International license](https://creativecommons.org/licenses/by/4.0/).

heatmap color key 0-20% 21-40% 41-60% 61-80% 81-100%

Figure 3
